# Supplementary material
Source: publisher figshare collection journal article supplement (https://diabetesjournals.figshare.com/ndownloader/files/25774151)
Supplement: Supplementary file 1 [file 25774151]

## **SUPPLEMENTARY MATERIAL**

Jersin et al. Role of the neutral amino acid transporter SLC7A10 in adipocyte lipid storage, obesity and insulin resistance.

### **This file includes:**

#### *Supplementary Tables:*

**Supplementary Table 1.** Primers used for qPCR.

**Supplementary Table 2.** Characteristics of donors of liposuction material for human primary adipose stromal cell (hASC) cultures.

**Supplementary Table 3.** Plasmids for overexpression.

**Supplementary Table 4.** mRNA expression and correlations for identified candidate genes with differential expression in human adipose tissue (Jersin et al. *Diabetes*)

**Supplementary Table 5.** mRNA co-expression with SLC7A10/ASC-1 mRNA in human adipocytes from the ADIPO cohort (12 lean, 12 obese) (Jersin et al. *Diabetes*)

#### *Supplementary Figures:*

**Supplementary Figure 1.** Correlations of *SLC7A10* mRNA expression with insulin resistance and adiposity traits in the RIKEN (n=58, panel A) and Sib Pair-Subgroup (n=24, panel B) cohorts.

**Supplementary Figure 2.** Effects of SLC7A10 inhibition on global gene expression measured by RNA-sequencing in human primary adipocytes.

**Supplementary Figure 3.** Confirmation of Slc7a10b loss-of-function mutation and outlier detection by RNA-sequencing of zebrafish visceral adipose tissue.

**Supplementary Figure 4.** Slc7A10b loss-of-function mutation in overfed zebrafish upregulates genes involved in urate, purine, and lipid metabolic processes.

**Supplementary Figure 5.** SLC7A10 impairment affects genes related to lipid- and energy metabolism in zebrafish adipose tissue and human primary adipocyte cultures.

**Supplementary Figure 6.** SLC7A10 inhibition affects mitochondrial respiration in cultured mouse adipocytes.

**Supplementary Figure 7.** Inhibition of SLC7A10 in human primary and mouse adipocytes regulates adipocyte serine uptake and redox status.

#### *Supplementary References*

## Supplementary Tables

**Supplementary Table 1.** Primers used for qPCR.

| Gene                 | Forward primer (5' → 3') | Reverse primer (5' → 3') |
|----------------------|--------------------------|--------------------------|
| <i>SLC7A10</i> Human | CGCCCTCCCCAGTCC          | CCCGAGCCGATGATGTTC       |
| <i>HPRT</i> * Human  | TGACCTTGATTTATTTTGCATACC | CGAGCAAGACGTTTCAGTCCT    |
| <i>Slc7a10</i> Mouse | CTTCTGGATGACACCGTCTG     | GATGGCACGAGGTAGGTTCT     |
| <i>Rps13</i> * Mouse | CAGGTCCGTTTTGTGACTG      | AGCATCCTTATCCTTTCTGT     |

\* Reference gene

**Supplementary Table 2.** Characteristics of donors of liposuction material for human primary adipose stromal cell (hASC) cultures.

| Donor no. | Figure no.             | Age | BMI  |
|-----------|------------------------|-----|------|
| 1         | 3C                     | 53  | 26.4 |
| 2         | 3C                     | 41  | 32.4 |
| 3         | 3D, 6B                 | 67  | 26   |
| 4         | 3F, S7B                | 32  | 26.9 |
| 5         | 3F, S7B                | 52  | 24.3 |
| 6         | 3F, S7C                | 52  | 30   |
| 7         | 3F, 6K                 | 52  | 26.7 |
| 8         | 4B-C, S2A-D, S5A-B, 6D | 53  | 31.5 |
| 9*        | 4B-C, S2A-D, S5A-B, 6D | 36  | 24.3 |
| 10        | 4B-C, S2A-D, S5A-B, 6D | 21  | 29.4 |
| 11        | 4B-C, S2A-D, S5A-B, 6D | 58  | 28   |
| 12        | 4B-C, S2A-D, S5A-B, 6D | 45  | 28.4 |
| 13        | 4B-C, S2A-D, S5A-B, 6D | 45  | 30   |
| 14        | 5A                     | 32  | 25.5 |
| 15        | 6A, S6A-B              | 48  | 27.7 |
| 16        | 6H                     | 46  | 24.3 |
| 17        | 6H                     | 32  | 28.4 |
| 18        | S6B                    | 68  | 32.8 |

\* Male.

**Supplementary Table 3.** Plasmids for overexpression.

| Vector name       | Description             | Manufacturer |
|-------------------|-------------------------|--------------|
| pCMV6-Kan/Neo     | mSlc7a10 (untagged)     | Origene      |
| pCMV6-XL4/XL5/XL6 | TrueClone™ Empty vector | Origene      |

**Supplementary Table 4.** mRNA expression and correlations for identified candidate genes with differential expression in human adipose tissue (Jersin et al. *Diabetes*)

| Cohort:                                                          |              | BPD-Fat (n=12) |          | ADIPO (n=12) |       |        |         |       |        | SibPair (n=88)                                                                                       |         |           |           |            |
|------------------------------------------------------------------|--------------|----------------|----------|--------------|-------|--------|---------|-------|--------|------------------------------------------------------------------------------------------------------|---------|-----------|-----------|------------|
| Symbol                                                           | Probe ID     | OM/SC          | Post/Pre | OM mRNA      |       |        | SC mRNA |       |        | WHR = $\alpha + \beta_1\text{SEX} + \beta_2\text{BMI} + \beta_3\text{GENE EXPRESSION} + \varepsilon$ |         |           |           |            |
|                                                                  |              | mRNA ratio     |          | Whole        | Adipo | SVF    | Whole   | Adipo | SVF    | Probe ID                                                                                             | SC mRNA | R-square* | p-value   | pos or neg |
| Higher in OM vs. SC fat, up-regulated in SC fat after fat loss   |              |                |          |              |       |        |         |       |        |                                                                                                      |         |           |           |            |
| CIDEA                                                            | ILMN_2390318 | 1.70           | 1.64     | 1 094        | 5 627 | 312    | 655     | 2 522 | 235    | 221295_at                                                                                            | 155     | 0.520     | 0.0002    | neg        |
| DFNA5                                                            | ILMN_1670145 | 1.77           | 1.96     | 920          | 835   | 2 344  | 385     | 478   | 1 552  | 203695_s_at                                                                                          | 28.3    | 0.450     | 0.122     | ns         |
| FLRT2                                                            | ILMN_1769615 | 1.63           | 1.90     | 565          | 255   | 1 696  | 313     | 407   | 841    | 204359_at                                                                                            | 36.1    | 0.460     | 0.048     | pos        |
| GAS1                                                             | ILMN_2062701 | 1.73           | 2.02     | 1 155        | 368   | 2 685  | 603     | 256   | 1 801  | 204457_s_at                                                                                          | 194     | 0.478     | 0.010     | pos        |
| GPD1L                                                            | ILMN_1694106 | 1.65           | 1.77     | 2 049        | 4 647 | 2 421  | 1 193   | 1 607 | 1 974  | 212510_at                                                                                            | 95.2    | 0.590     | 2.14x10-7 | neg        |
| HOXA5                                                            | ILMN_1753613 | 2.38           | 2.11     | 1 418        | 4 692 | 4 448  | 800     | 2 797 | 2 819  | 213844_at                                                                                            | 50.2    | 0.469     | 0.021     | neg        |
| SLC7A10                                                          | ILMN_1681087 | 1.83           | 1.84     | 1 603        | 4 986 | 312    | 866     | 2 225 | 204    | 220868_s_at                                                                                          | 20.5    | 0.510     | 0.001     | neg        |
| Higher in OM vs. SC fat, down-regulated in SC fat after fat loss |              |                |          |              |       |        |         |       |        |                                                                                                      |         |           |           |            |
| ALDH1A2                                                          | ILMN_1748538 | -1.54          | 2.48     | 1 686        | 464   | 5 459  | 505     | 215   | 814    | 207016_s_at                                                                                          | 18.0    | 0.498     | 0.002     | pos        |
| GFPT2                                                            | ILMN_1709674 | -1.93          | 1.61     | 1 153        | 240   | 1 225  | 782     | 243   | 1 252  | 205100_at                                                                                            | 12.4    | 0.443     | 0.247     | ns         |
| PDLIM3                                                           | ILMN_2230025 | -1.55          | 1.94     | 989          | 487   | 1 478  | 513     | 250   | 676    | 209621_s_at                                                                                          | 7.9     | 0.448     | 0.150     | ns         |
| TFPI2                                                            | ILMN_2068104 | -1.52          | 1.94     | 577          | 221   | 694    | 269     | 178   | 223    | 209278_s_at                                                                                          | 66.8    | 0.437     | 0.542     | ns         |
| TMEM158                                                          | ILMN_1792455 | -1.63          | 1.67     | 568          | 285   | 964    | 382     | 304   | 445    | 213338_at                                                                                            | 2.8     | 0.472     | 0.016     | pos        |
| Lower in OM vs. SC fat, up-regulated in SC fat after fat loss    |              |                |          |              |       |        |         |       |        |                                                                                                      |         |           |           |            |
| APOC1                                                            | ILMN_1789007 | 3.21           | -1.53    | 309          | 259   | 873    | 544     | 536   | 1 556  | 204416_x_at                                                                                          | 50.0    | 0.445     | 0.191     | ns         |
| COL6A3                                                           | ILMN_2307861 | 1.67           | -1.54    | 3 342        | 3 154 | 15 450 | 5 519   | 3 276 | 23 271 | 201438_at                                                                                            | 569     | 0.447     | 0.167     | ns         |
| CTHRC1                                                           | ILMN_2117508 | 1.52           | -2.01    | 306          | 154   | 378    | 747     | 180   | 1122   | 225681_at                                                                                            | 103     | 0.465     | 0.029     | pos        |
| CTSG                                                             | ILMN_1680424 | 2.41           | -1.64    | 576          | 181   | 2 799  | 1 135   | 220   | 7 428  | 205653_at                                                                                            | 14.4    | 0.515     | 0.0003    | pos        |
| DCLK1                                                            | ILMN_2165354 | 1.98           | -1.56    | 418          | 396   | 1 465  | 696     | 471   | 3 725  | 229800_at                                                                                            | 91.2    | 0.462     | 0.041     | pos        |
| EMX2                                                             | ILMN_2187746 | 1.63           | -1.54    | 151          | 175   | 183    | 239     | 443   | 634    | 221950_at                                                                                            | 12.0    | 0.489     | 0.003     | pos        |
| FNDC1                                                            | ILMN_2163873 | 3.60           | -1.62    | 205          | 146   | 299    | 322     | 190   | 2 152  | 226930_at                                                                                            | 13.6    | 0.443     | 0.246     | ns         |
| PRRX1                                                            | ILMN_1739496 | 1.76           | -2.23    | 1 112        | 707   | 4 367  | 2 266   | 1 014 | 11 052 | 226695_at                                                                                            | 202     | 0.518     | 0.0002    | pos        |
| SERPINA5                                                         | ILMN_1759910 | 1.52           | -3.10    | 165          | 163   | 243    | 559     | 202   | 1925   | 209443_at                                                                                            | 12.6    | 0.468     | 0.024     | pos        |

| <i>Lower in OM vs. SC fat, down-regulated in SC fat after fat loss</i> |              |       |       |       |       |       |       |        |       |             |      |       |       |     |
|------------------------------------------------------------------------|--------------|-------|-------|-------|-------|-------|-------|--------|-------|-------------|------|-------|-------|-----|
| CCND1                                                                  | ILMN_1688480 | -1.62 | -3.23 | 2 587 | 4 866 | 3 457 | 7 409 | 18 302 | 4 661 | 208712_at   | 124  | 0.471 | 0.017 | pos |
| DARC                                                                   | ILMN_1723684 | -1.65 | -1.55 | 2 191 | 1 169 | 2 456 | 3 381 | 666    | 3 742 | 208335_s_at | 70.5 | 0.467 | 0.025 | pos |
| EGFL6                                                                  | ILMN_2057479 | -5.68 | -6.95 | 351   | 355   | 711   | 3 039 | 15 392 | 1 146 | 219454_at   | 428  | 0.461 | 0.045 | pos |
| GPR56                                                                  | ILMN_1697228 | -2.11 | -1.64 | 868   | 968   | 1 455 | 1 347 | 624    | 1 959 | 212070_at   | 74.7 | 0.436 | 0.563 | ns  |
| IFIT3                                                                  | ILMN_1664543 | -1.55 | -1.53 | 214   | 281   | 255   | 321   | 235    | 293   | 229450_at   | 91.5 | 0.462 | 0.040 | pos |
| INHBB                                                                  | ILMN_1685714 | -1.80 | -1.53 | 754   | 1 584 | 675   | 1 205 | 2 511  | 940   | 205258_at   | 75.5 | 0.478 | 0.010 | pos |
| ITIH5                                                                  | ILMN_1731862 | -1.60 | -1.67 | 379   | 515   | 230   | 623   | 1 088  | 327   | 219064_at   | 457  | 0.486 | 0.005 | pos |
| MSC                                                                    | ILMN_1741404 | -2.32 | -1.72 | 341   | 599   | 274   | 578   | 968    | 312   | 209928_s_at | 3.3  | 0.470 | 0.018 | pos |
| NOTCH3                                                                 | ILMN_1658926 | -1.51 | -2.58 | 480   | 909   | 888   | 1 408 | 3 183  | 2 143 | 203238_s_at | 16.5 | 0.479 | 0.009 | pos |
| PEMT                                                                   | ILMN_1745806 | -1.51 | -2.30 | 1 129 | 3 191 | 798   | 2 368 | 10 395 | 1 665 | 207621_s_at | 138  | 0.486 | 0.004 | pos |
| RND3                                                                   | ILMN_1759513 | -3.83 | -1.69 | 2 143 | 782   | 1 147 | 2 996 | 1 959  | 1 887 | 212724_at   | 83.4 | 0.469 | 0.020 | pos |
| SERPINA3                                                               | ILMN_1788874 | -1.83 | -1.66 | 367   | 211   | 624   | 602   | 325    | 1 007 | 202376_at   | 4.8  | 0.457 | 0.063 | ns  |
| SNCG                                                                   | ILMN_1653161 | -2.01 | -1.63 | 566   | 1 163 | 327   | 975   | 3 253  | 396   | 209877_at   | 18.2 | 0.440 | 0.334 | ns  |
| SOX7                                                                   | ILMN_2134056 | -3.14 | -1.82 | 495   | 208   | 214   | 764   | 174    | 258   | 228698_at   | 93.1 | 0.467 | 0.024 | neg |
| TNFRSF4                                                                | ILMN_2112256 | -1.94 | -1.55 | 348   | 346   | 470   | 518   | 270    | 541   | 214228_x_at | 6.0  | 0.454 | 0.085 | ns  |
| TUBB2A                                                                 | ILMN_2044813 | -2.51 | -1.82 | 590   | 867   | 325   | 1 101 | 2 276  | 516   | 204141_at   | 588  | 0.492 | 0.003 | pos |
| UPP1                                                                   | ILMN_1746837 | -2.18 | -1.50 | 1 264 | 506   | 772   | 1 749 | 640    | 1 214 | 203234_at   | 12.3 | 0.492 | 0.003 | pos |

Adipo, isolated adipocyte fraction; neg, negative correlation; ns, non-significant; OM, omental adipose tissue; pos, positive correlation; Pre, samples obtained before bariatric surgery; Post, samples obtained one year after bariatric surgery; SC, subcutaneous adipose tissue; SVF, stromal vascular fraction; Whole, whole adipose tissue.

**Supplementary Table 5.** mRNA co-expression with SLC7A10/ASC-1 mRNA in human adipocytes from the ADIPO cohort (12 lean, 12 obese) (Jersin et al. *Diabetes*)

| SYMBOL    | Coeff. | SYMBOL           | Coeff. | SYMBOL           | Coeff. | SYMBOL           | Coeff. |
|-----------|--------|------------------|--------|------------------|--------|------------------|--------|
| SLC7A10   | 1      | <i>continued</i> |        | <i>continued</i> |        | <i>continued</i> |        |
| UTX       | 0.909  | CCNH             | 0.766  | PHYH             | 0.734  | DNAJA3           | 0.715  |
| BCKDHB    | 0.895  | PPP1R16A         | 0.766  | RAPGEF4          | 0.734  | GSDMB            | 0.715  |
| AK3L1     | 0.850  | ACOT1            | 0.764  | (undefined)      | 0.733  | HIBADH           | 0.714  |
| TMEM22    | 0.839  | MLYCD            | 0.763  | MED26            | 0.733  | CD40             | 0.714  |
| RPL34     | 0.836  | TP53I13          | 0.763  | HIGD2A           | 0.733  | TMEM69           | 0.713  |
| LGALS12   | 0.830  | UBTD1            | 0.760  | C7orf26          | 0.733  | LACTB2           | 0.713  |
| BRP44L    | 0.826  | CMTM7            | 0.760  | ABCC9            | 0.732  | MRPL46           | 0.713  |
| COX7C     | 0.822  | CCBL2            | 0.758  | LOC731007        | 0.731  | SOX6             | 0.713  |
| CHL1      | 0.822  | FAM73B           | 0.758  | POLS             | 0.731  | GSDMB            | 0.712  |
| MCCC1     | 0.822  | CKB              | 0.757  | PIGP             | 0.730  | D2HGDH           | 0.710  |
| DHTKD1    | 0.821  | MRPS11           | 0.756  | C14orf2          | 0.730  | FGFRL1           | 0.710  |
| AGT       | 0.820  | MOSC2            | 0.755  | DTNA             | 0.730  | PPP1R1B          | 0.710  |
| SDHB      | 0.818  | PCCA             | 0.755  | LETMD1           | 0.730  | ZFHX4            | 0.710  |
| ACADM     | 0.817  | COX5A            | 0.755  | TFAM             | 0.729  | RHOT1            | 0.708  |
| NDUFB5    | 0.812  | RTCD1            | 0.755  | MRPS34           | 0.729  | (undefined)      | 0.708  |
| MOSC1     | 0.808  | CYC1             | 0.755  | (undefined)      | 0.729  | NAALAD2          | 0.708  |
| COQ9      | 0.808  | FLJ23834         | 0.754  | CSNK2A1          | 0.728  | TXNDC12          | 0.707  |
| C7orf30   | 0.803  | AQP7P2           | 0.754  | CICE             | 0.728  | FABP5            | 0.707  |
| ATL2      | 0.802  | RTN3             | 0.753  | DTNA             | 0.728  | LOC653145        | 0.707  |
| C6orf66   | 0.798  | LOC648605        | 0.753  | (undefined)      | 0.727  | SNX5             | 0.706  |
| C17orf95  | 0.795  | ZFPM1            | 0.753  | (undefined)      | 0.727  | PCBD1            | 0.706  |
| ELOVL3    | 0.795  | (undefined)      | 0.752  | MRPL21           | 0.725  | TSPAN13          | 0.706  |
| VPS54     | 0.789  | MCAT             | 0.750  | HAX1             | 0.724  | ORMDL3           | 0.705  |
| ALDH1L1   | 0.789  | LOC652837        | 0.749  | CMC1             | 0.723  | CNIH             | 0.705  |
| DDT       | 0.789  | CAMK1            | 0.749  | LOC653479        | 0.723  | CCT7             | 0.704  |
| UBE2W     | 0.788  | GART             | 0.748  | UCKL1            | 0.723  | PATL1            | 0.703  |
| UQCRFS1   | 0.788  | XRN1             | 0.748  | SLC25A4          | 0.722  | ARIH1            | 0.703  |
| BTF3L4    | 0.784  | THYN1            | 0.747  | LDHD             | 0.722  | CLPP             | 0.703  |
| ANO6      | 0.784  | COX5B            | 0.746  | C12orf45         | 0.722  | CASD1            | 0.702  |
| RDH10     | 0.783  | PXMP2            | 0.746  | DMRT2            | 0.721  | C4orf14          | 0.702  |
| UQCRH     | 0.783  | POLR1D           | 0.745  | PXMP2            | 0.720  | AUH              | 0.701  |
| LOC646345 | 0.780  | LOC648695        | 0.745  | SH3GLB1          | 0.720  | BCKDHB           | 0.701  |
| C7orf44   | 0.780  | AK3L1            | 0.743  | C2orf56          | 0.719  | RFXANK           | 0.701  |
| PCK1      | 0.776  | FAM18B           | 0.743  | FAM152B          | 0.718  | SCO1             | 0.701  |
| ATP5F1    | 0.776  | SLC2A1           | 0.742  | PCGF6            | 0.718  | LOC650494        | 0.701  |
| HSPD1     | 0.775  | HIST1H2BD        | 0.742  | CCNF             | 0.718  | LOC643300        | 0.700  |
| KIAA1191  | 0.773  | C21orf70         | 0.741  | EXOSC3           | 0.718  | GOT1             | 0.700  |
| ACAD8     | 0.772  | AK2              | 0.741  | ALKBH1           | 0.718  | SYPL1            | 0.700  |
| ESRRA     | 0.771  | CDH23            | 0.739  | PCBD1            | 0.717  | DCI              | 0.699  |
| ABHD3     | 0.771  | CYB5A            | 0.738  | BPHL             | 0.717  | MCCC2            | 0.699  |
| SLC25A5   | 0.770  | C21orf33         | 0.738  | SLC25A40         | 0.716  | ACOT2            | 0.699  |
| MRPL41    | 0.770  | CS               | 0.737  | ATP1B3           | 0.716  | (undefined)      | 0.699  |
| ELK1      | 0.769  | ENDOG            | 0.737  | FBXO21           | 0.715  | STOX1            | 0.698  |
| TMLHE     | 0.767  | BCKDHB           | 0.736  | MRPS22           | 0.715  | FRMD4A           | 0.698  |
| C2orf47   | 0.767  | MRPL33           | 0.735  | ZNF280D          | 0.715  | WDR43            | 0.698  |
| SYMBOL    | Coeff. | SYMBOL           | Coeff. | SYMBOL           | Coeff. | SYMBOL           | Coeff. |

|                  |               |                  |               |                  |               |                  |               |
|------------------|---------------|------------------|---------------|------------------|---------------|------------------|---------------|
| <i>continued</i> |               | <i>continued</i> |               | <i>continued</i> |               | <i>continued</i> |               |
| RPAIN            | 0.698         | CALML4           | 0.687         | TMCO6            | 0.674         | MACROD1          | 0.660         |
| MTFMT            | 0.698         | RDH14            | 0.687         | SEC24B           | 0.674         | CA2              | 0.659         |
| SLC4A4           | 0.698         | TAF1L            | 0.686         | (undefined)      | 0.674         | GTF2IRD1         | 0.659         |
| DTNA             | 0.698         | DDX47            | 0.685         | PRIM1            | 0.674         | C17orf61         | 0.658         |
| ANKRD11          | 0.697         | CDKN2C           | 0.685         | LETMD1           | 0.673         | FBXO46           | 0.658         |
| QPCT             | 0.697         | THYN1            | 0.684         | GBE1             | 0.673         | HSCB             | 0.658         |
| FGFRL1           | 0.696         | SDHA             | 0.682         | TYSND1           | 0.673         | NDUFV2           | 0.658         |
| MRPL39           | 0.696         | SNORD100         | 0.682         | EBAG9            | 0.672         | LOC643466        | 0.657         |
| VPS26B           | 0.696         | SUMO2            | 0.682         | MRPS23           | 0.671         | NDUFB11          | 0.656         |
| KIAA0261         | 0.696         | KLF15            | 0.682         | TMLHE            | 0.671         | MGC70857         | 0.656         |
| GCHFR            | 0.695         | HSD17B10         | 0.681         | MESP1            | 0.671         | (undefined)      | 0.656         |
| C1orf66          | 0.695         | GNAQ             | 0.681         | CPEB2            | 0.671         | NDUFV3           | 0.655         |
| SPTB             | 0.695         | CMTM7            | 0.681         | MKNK2            | 0.670         | PMPCB            | 0.655         |
| STRADB           | 0.695         | RABGGTB          | 0.681         | (undefined)      | 0.670         | (undefined)      | 0.655         |
| VPRBP            | 0.694         | GGCT             | 0.681         | ALDH6A1          | 0.670         | VPS35            | 0.655         |
| PLAGL2           | 0.694         | SLC3A2           | 0.681         | FBXO28           | 0.669         | LPIN1            | 0.655         |
| SLC16A7          | 0.694         | CNBP             | 0.680         | C2orf56          | 0.669         | AASDHPPT         | 0.655         |
| ACADL            | 0.694         | RSBN1            | 0.680         | AGPAT2           | 0.669         | LOC642335        | 0.655         |
| NDUFB6           | 0.694         | RBMS2            | 0.680         | PPARG            | 0.669         | NPC1             | 0.654         |
| CRLS1            | 0.694         | SCP2             | 0.680         | PIGP             | 0.668         | SLC2A4           | 0.654         |
| BDH1             | 0.693         | (undefined)      | 0.680         | STK35            | 0.668         | RAVER1           | 0.654         |
| SPRYD4           | 0.693         | LOC284023        | 0.679         | MAD2L1BP         | 0.668         | DAP3             | 0.654         |
| ACADM            | 0.693         | (undefined)      | 0.679         | CMTM7            | 0.667         | L2HGDH           | 0.653         |
| ACP1             | 0.693         | ALKBH1           | 0.679         | INTS6            | 0.667         | MAZ              | 0.653         |
| NCOR2            | 0.693         | ZNF280D          | 0.679         | SOSTDC1          | 0.666         | FMO5             | 0.653         |
| COX6A1           | 0.693         | SCN3A            | 0.678         | LIX1L            | 0.665         | EIF3M            | 0.653         |
| MRPS2            | 0.692         | C17orf95         | 0.678         | PIK3CB           | 0.665         | SEC11A           | 0.653         |
| C9orf72          | 0.692         | (undefined)      | 0.678         | CS               | 0.664         | (undefined)      | 0.653         |
| GFPT1            | 0.692         | CNIH             | 0.678         | AQP7             | 0.664         | PCNX             | 0.652         |
| MLX              | 0.692         | CA2              | 0.678         | ANKRD9           | 0.664         | YPEL5            | 0.652         |
| SNURF            | 0.692         | SEPHS1           | 0.678         | PDZD7            | 0.664         | NDFIP2           | 0.652         |
| BLOC1S1          | 0.691         | ESRRAP2          | 0.677         | ATAD2            | 0.663         | NAT5             | 0.652         |
| PAXIP1           | 0.691         | LOC729317        | 0.677         | SFXN2            | 0.663         | (undefined)      | 0.652         |
| UTP18            | 0.691         | (undefined)      | 0.677         | MEIS2            | 0.663         | HYLS1            | 0.652         |
| C18orf8          | 0.690         | NET1             | 0.677         | GTPBP3           | 0.663         | RPL35A           | 0.652         |
| GLRX2            | 0.690         | MCM7             | 0.677         | RAB40C           | 0.663         | STOX1            | 0.651         |
| LOC652545        | 0.690         | DUSP4            | 0.677         | TBP              | 0.663         | STAMBP           | 0.651         |
| GRPEL1           | 0.690         | ICAM3            | 0.676         | CLK2             | 0.663         | DHPS             | 0.651         |
| CCNC             | 0.689         | DNAH1            | 0.676         | SEC24B           | 0.662         | STBD1            | 0.650         |
| TRPT1            | 0.689         | CSNK2A2          | 0.676         | NDUFAF2          | 0.662         | FBXO44           | 0.650         |
| PATZ1            | 0.689         | LOC285074        | 0.676         | HINT3            | 0.662         | OXA1L            | 0.650         |
| SLC25A22         | 0.689         | C16orf14         | 0.676         | LOC645436        | 0.662         | (undefined)      | 0.650         |
| PC               | 0.689         | RPL9             | 0.675         | PPP2R2D          | 0.662         | ACY1             | 0.650         |
| SMARCD1          | 0.688         | (undefined)      | 0.675         | (undefined)      | 0.661         |                  |               |
| UBQLN1           | 0.688         | KIAA0367         | 0.675         | PLCXD1           | 0.660         |                  |               |
| CASZ1            | 0.688         | C1QL2            | 0.675         | TCF12            | 0.660         |                  |               |
| LDLRAD1          | 0.688         | PCCB             | 0.675         | ZNF512B          | 0.660         |                  |               |
| CXorf15          | 0.687         | POLE             | 0.674         | MIA3             | 0.660         |                  |               |
|                  | <b>Coeff.</b> | <b>SYMBOL</b>    | <b>Coeff.</b> | <b>SYMBOL</b>    | <b>Coeff.</b> | <b>SYMBOL</b>    | <b>Coeff.</b> |

**SYMBOL**

|             |        |             |           |             |        |         |        |
|-------------|--------|-------------|-----------|-------------|--------|---------|--------|
| (undefined) | -0.650 | continued   | continued | continued   |        |         |        |
| IFT57       | -0.651 | CANX        | -0.676    | SETBP1      | -0.703 | TLN1    | -0.769 |
| OLFML1      | -0.651 | ITGA11      | -0.676    | DAB2        | -0.704 | CCNYL1  | -0.769 |
| TFPI        | -0.652 | CPD         | -0.677    | ZYX         | -0.705 | RAP2A   | -0.771 |
| C5orf5      | -0.652 | LAPTM5      | -0.677    | SOX4        | -0.705 | FBLN2   | -0.775 |
| ST5         | -0.653 | ANXA11      | -0.677    | EMX2        | -0.705 | RUFY3   | -0.781 |
| COL6A2      | -0.653 | FAM129A     | -0.677    | C21orf51    | -0.705 | TMSB10  | -0.786 |
| CCDC25      | -0.654 | AP1S2       | -0.677    | ACTG1       | -0.707 | IQSEC2  | -0.787 |
| HABP4       | -0.655 | THBS2       | -0.678    | ZNF219      | -0.709 | PTTG2   | -0.793 |
| CILP        | -0.655 | ARHGAP28    | -0.678    | COL4A5      | -0.711 | MGP     | -0.845 |
| LOC648470   | -0.655 | FBLN5       | -0.678    | PDLIM7      | -0.711 | RANBP3L | -0.846 |
| PDCL3       | -0.657 | SLC7A2      | -0.679    | RNASEL      | -0.711 |         |        |
| (undefined) | -0.657 | MYO1B       | -0.680    | MAP1B       | -0.713 |         |        |
| KIAA1160    | -0.657 | C1orf24     | -0.681    | STX2        | -0.714 |         |        |
| KCTD12      | -0.658 | MTTP        | -0.681    | PSAP        | -0.716 |         |        |
| LOC651302   | -0.659 | SPARC       | -0.681    | ANKS1B      | -0.717 |         |        |
| TMEM119     | -0.659 | CALM3       | -0.684    | DKK3        | -0.719 |         |        |
| LUM         | -0.660 | CDH11       | -0.684    | RCN1        | -0.720 |         |        |
| ITIH5       | -0.661 | ACTB        | -0.685    | SPON2       | -0.723 |         |        |
| TRPV2       | -0.661 | CAPZB       | -0.685    | DGKI        | -0.724 |         |        |
| LOC390956   | -0.661 | (undefined) | -0.685    | CAPNS1      | -0.726 |         |        |
| CLN5        | -0.662 | LOC389958   | -0.686    | SLC2A12     | -0.726 |         |        |
| ACTN4       | -0.662 | REEP5       | -0.688    | SAP18       | -0.727 |         |        |
| (undefined) | -0.663 | CCDC105     | -0.688    | RNASEL      | -0.732 |         |        |
| LMOD1       | -0.663 | ACTB        | -0.689    | LOX         | -0.735 |         |        |
| IFITM5      | -0.663 | DAAM2       | -0.689    | MYO1D       | -0.738 |         |        |
| (undefined) | -0.663 | SLC39A3     | -0.689    | SH3BGRL2    | -0.741 |         |        |
| (undefined) | -0.664 | CCBP2       | -0.690    | CDC26       | -0.741 |         |        |
| FLJ22374    | -0.665 | ARHGAP21    | -0.691    | MED20       | -0.742 |         |        |
| BICD2       | -0.666 | VWA1        | -0.693    | KIAA1598    | -0.742 |         |        |
| NEXN        | -0.666 | COL4A5      | -0.694    | TAX1BP3     | -0.743 |         |        |
| CLEC3B      | -0.668 | LPAR1       | -0.694    | DPT         | -0.748 |         |        |
| (undefined) | -0.668 | CNN3        | -0.696    | TMEM98      | -0.748 |         |        |
| SRI         | -0.669 | INHBB       | -0.698    | MGP         | -0.749 |         |        |
| PON2        | -0.669 | DCTN1       | -0.699    | EMX2        | -0.751 |         |        |
| CYLN2       | -0.671 | CXCL12      | -0.700    | ABHD4       | -0.754 |         |        |
| CETN2       | -0.673 | CCND2       | -0.701    | DRAM        | -0.756 |         |        |
| LOC391013   | -0.673 | PFKP        | -0.701    | ITGA11      | -0.757 |         |        |
| CANX        | -0.675 | CAMK1D      | -0.702    | (undefined) | -0.766 |         |        |
| ITGB5       | -0.675 | ASCC3       | -0.702    | ITGB1       | -0.768 |         |        |

Coeff., Pearson's correlation coefficient; SYMBOL, Gene name.

## Supplementary Figures

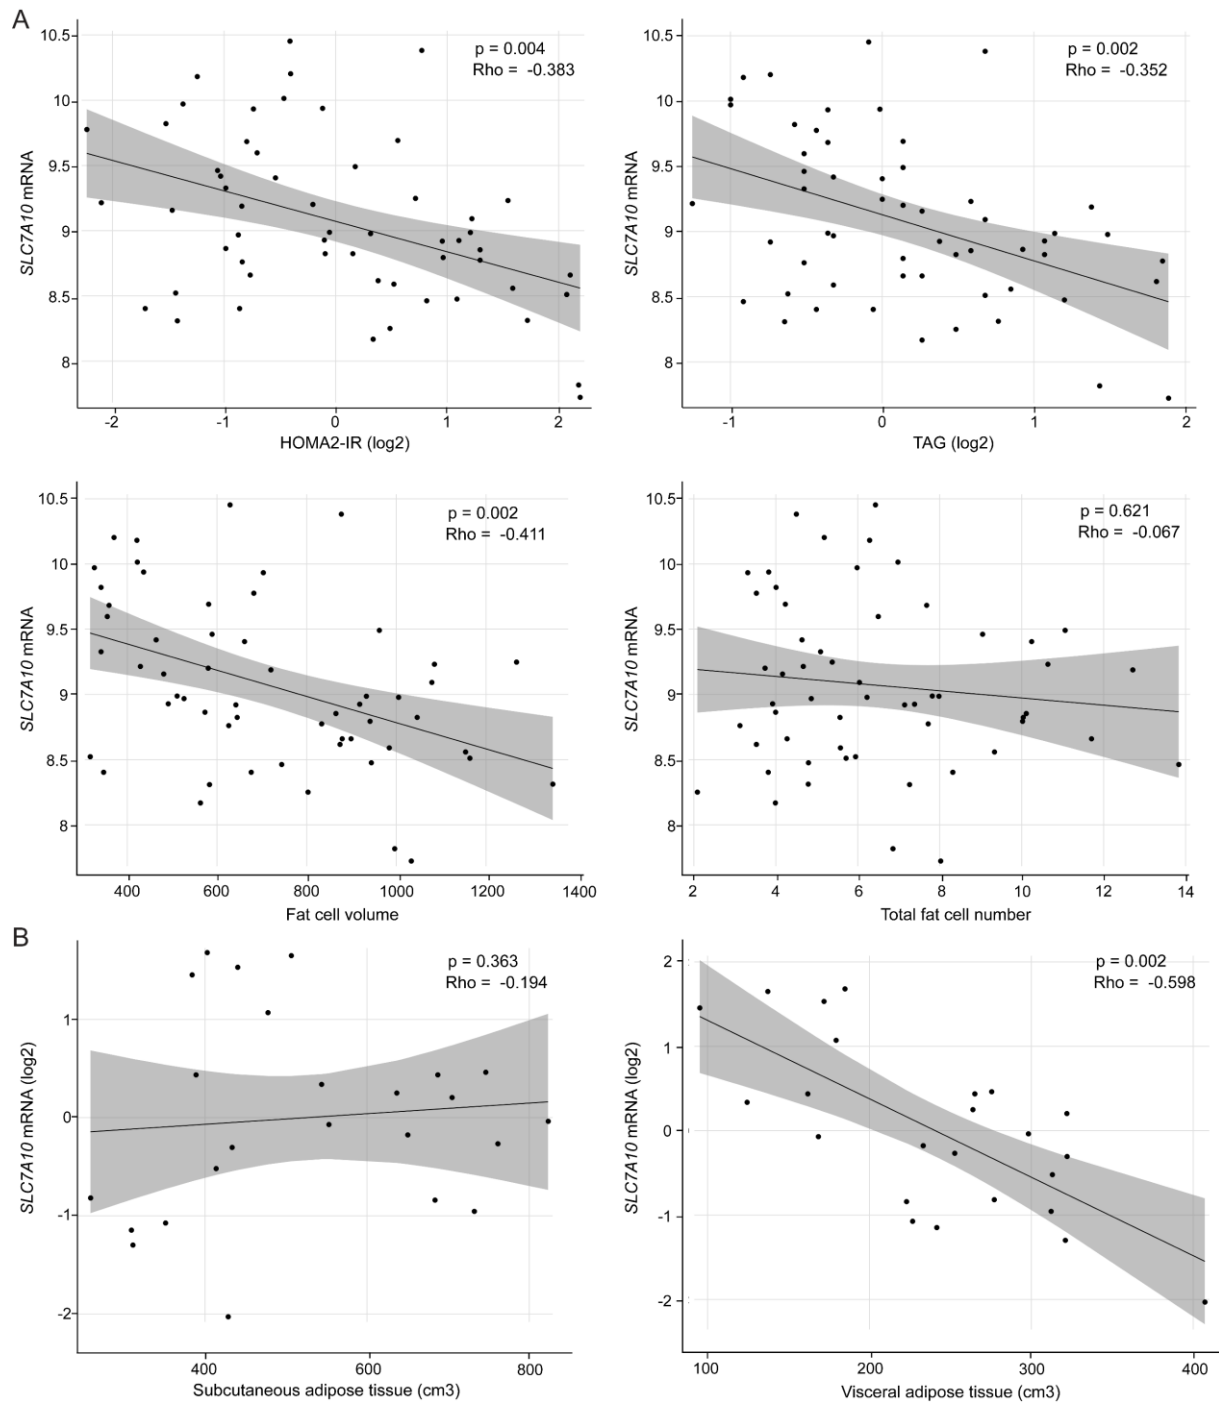

**Supplementary Figure 1. Correlations of *SLC7A10* mRNA expression with insulin resistance and adiposity traits in the RIKEN (n=58, panel A) and Sib Pair-Subgroup (n=24, panel B) cohorts.**

SLC7A10 mRNA expression was retrieved from microarray expression analyses (Affymetrix) and Spearman correlations were calculated.



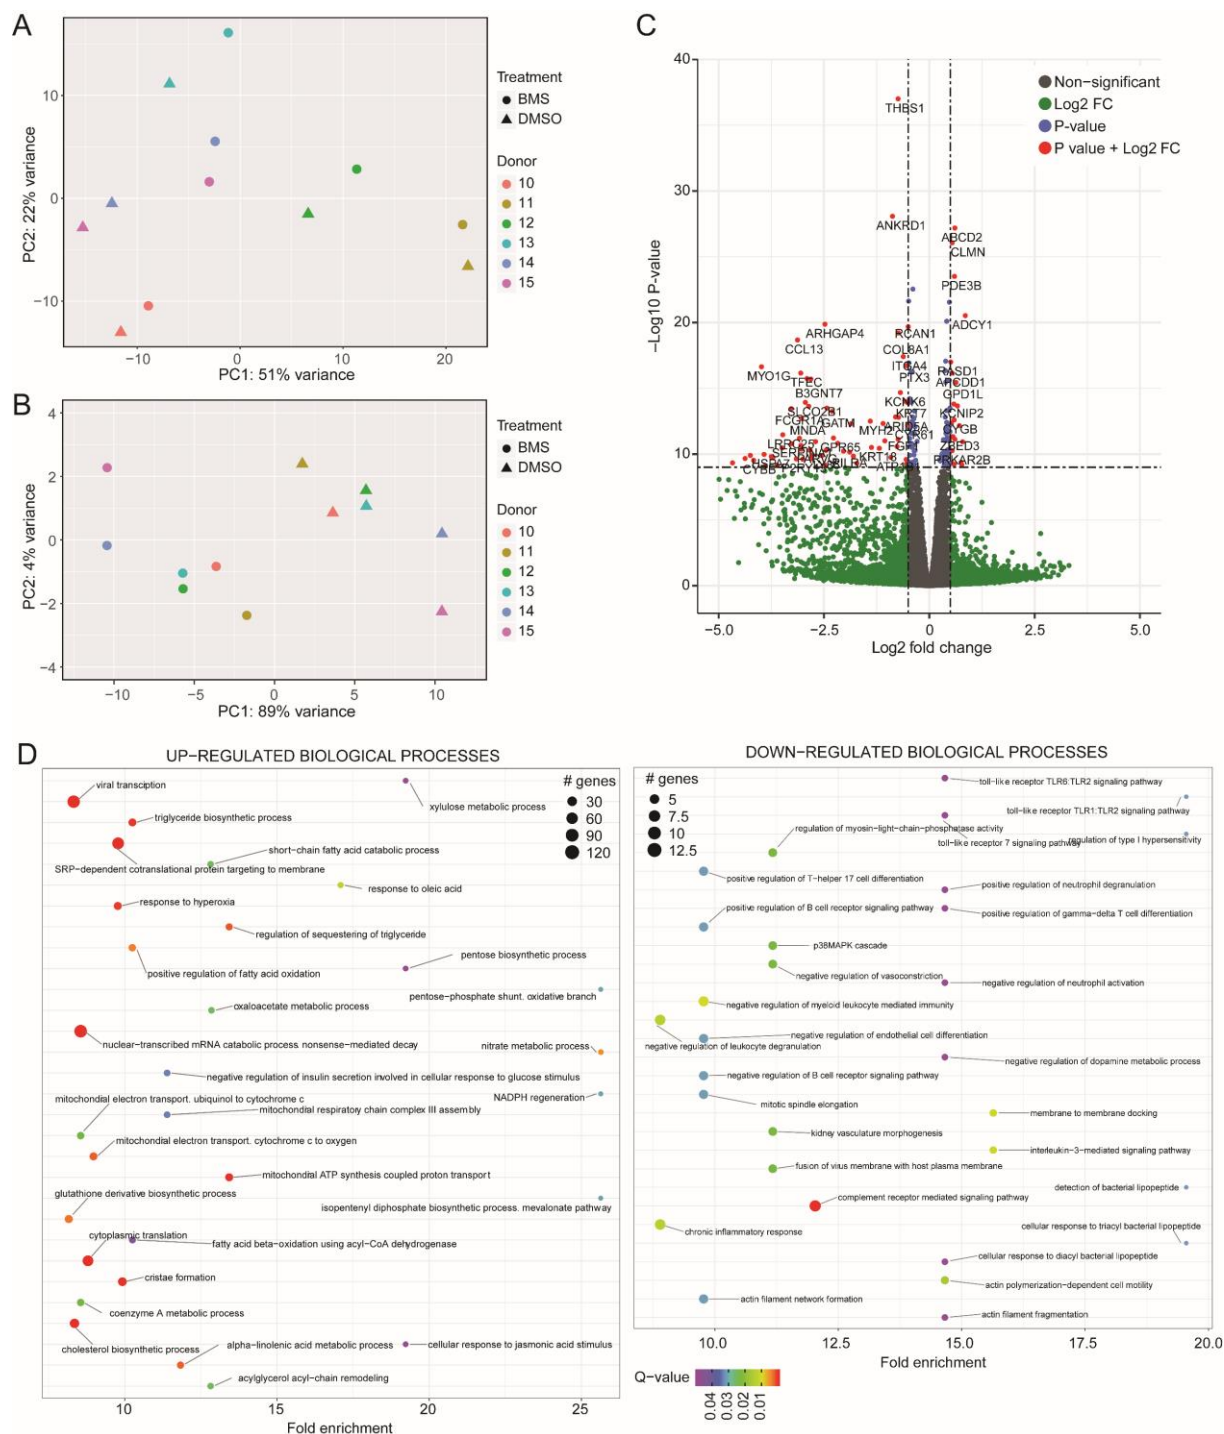

**Supplementary Figure 2. Effects of SLC7A10 inhibition on global gene expression measured by RNA-sequencing in human primary adipocytes.**

Human adipose stromal cell (hASC) cultures were obtained from abdominal subcutaneous adipose tissue (n=6), differentiated for 8 days, and treated with DMSO or SLC7A10 inhibitor 1 for 24 hours from day 7-8. Global gene expression was measured by RNA-seq, where sample reads were mapped against the Human genome (GrCH38) using HiSat (Version 2.1.0), with options `-t "exon"` and `-g "gene_id"` to summarize count values from individual exons into genes, resulting in a matrix of raw counts. Aligned reads were then put into featureCounts (Version 1.5.2) with default options, resulting in a matrix of raw counts. Data were normalized and differential expression analysis was performed utilizing DESeq2 (Version 1.22.2). Pathway analysis of RNA sequencing data was performed using PANTHER classification system (PANTHER v.14.0). Differentially expressed genes identified with a FDR cut-off ( $p < 0.05$ ) were used as input and Fischer's exact test was used to identify statistically over/under represented pathways with a FDR cut-off ( $p < 0.05$ ) (1). Significant ontologies were visualized using ggplot2 package (Version 3.1.0).

(A-B) Principal component (PC) analysis of samples in DMSO and SLC7A10 inhibitor 1 treated groups are shown in (A) unadjusted and (B) adjusted for patient.

(C) Volcano plot of differentially expressed genes between DMSO and SLC7A10 inhibitor 1 treatments. x-axis corresponds to log2 fold change (log2FC) and y-axis corresponds to  $-\log_{10}$  (P-value). Red dots represent the transcripts with an absolute log2FC > 0.5 and P-value < 10E-10; green dots represent the transcripts with an absolute log2FC > 0.5; blue dots represent transcripts with P-value < 10E-10; grey dots represent transcripts which do not pass above thresholds.

(D) Enrichment plot representing up-regulated and down-regulated biological processes between DMSO and SLC7A10 inhibitor treatments. Top 30 biological processes with an FDR-corrected P-value < 0.05 and fold enrichment  $\geq 8$  (arbitrary threshold for the sake of visual representation) are reported here. Gene Ontology (GO) terms was analyzed by PANTHER ([www.pantherdb.org](http://www.pantherdb.org)).

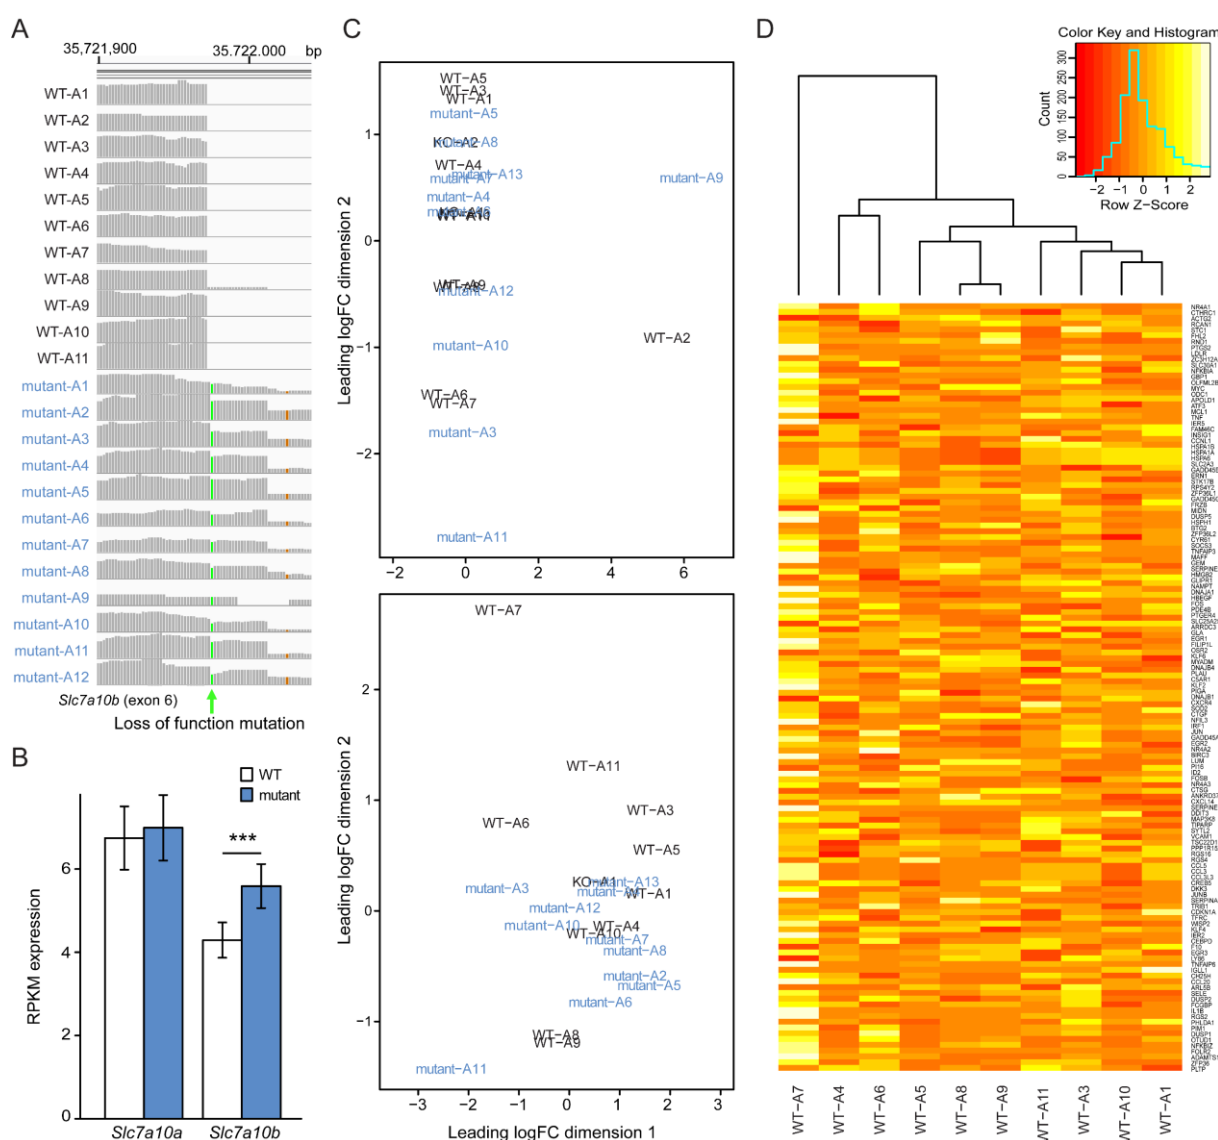

**Supplementary Figure 3. Confirmation of Slc7a10b loss-of-function mutation and outlier detection by RNA-sequencing of zebrafish visceral adipose tissue.**

Mature (four-month old) wildtype (WT) and Slc7a10b mutant male zebrafish were fed 50-100% more than their regular feed for eight weeks. Visceral adipose tissue from three zebrafish housed in the same tank during the overfeeding was pooled. RNA was isolated and RNA-seq was performed. Sample reads were mapped against the

Zebrafish genome (GRCz10) using HiSat (Version 2.05), matrixed in featureCounts (Version 1.5.2) and analyzed using DESeq2 (version 1.22.1).

(A) Integrative genomics viewer (IGV) read visualization of each Zebrafish sample at the target site, with the A→T splice site mutation sa15382 highlighted in green.

(B) Visualized expression values (RPKM) of average *Slc7a10a* and *Slc7a10b* expression in both WT and mutants.

(C) Outlier removal of anomalous RNA-Seq sequence reads (by sample) was performed by generating multidimensional scaling plots of distances between digital gene expression profiles. The samples mutant-A9 and WT-A2 were visually identified in the top graph as being erroneous due to their spread from the main cluster in the first dimension. The lower graph displays the distances after the removal of the first two outliers, showing WT-A7 spreading from the main cluster.

(D) The differential expression in WT-A7 was further investigated by utilizing the ontology gene expression profiles of the WT samples, and we observed that this sample differed significantly from other wild-types in the expression profile of stress-induced genes identified in human adipose tissue, warranting removal of WT-A7 from further downstream analysis. The stress-induced genes were identified by microarray analysis of omental human adipose tissue biopsies of non-obese patients. Omental biopsies from four patients were either frozen immediately or ~1 hour after surgical excision. The 1-hour delayed freezing induced a large array of immediate-early stress-responsive genes including IL8 (induced already after 10 minutes) [24], largely recapitulating differences we previously observed between lean and extremely obese patients [153] (data not shown). We concluded that the WT-A7 sample was acutely stressed either *in vivo* or *ex vivo*, and that its inclusion in our initial analysis was entirely responsible for an apparent down-regulation of stress-responsive/inflammatory genes in the mutant compared to WT zebrafish. WT-A7 was therefore removed from further analysis, to avoid a dominating artefactual impact on gene ontology terms.

\*\*\*,  $p < 0.001$ .

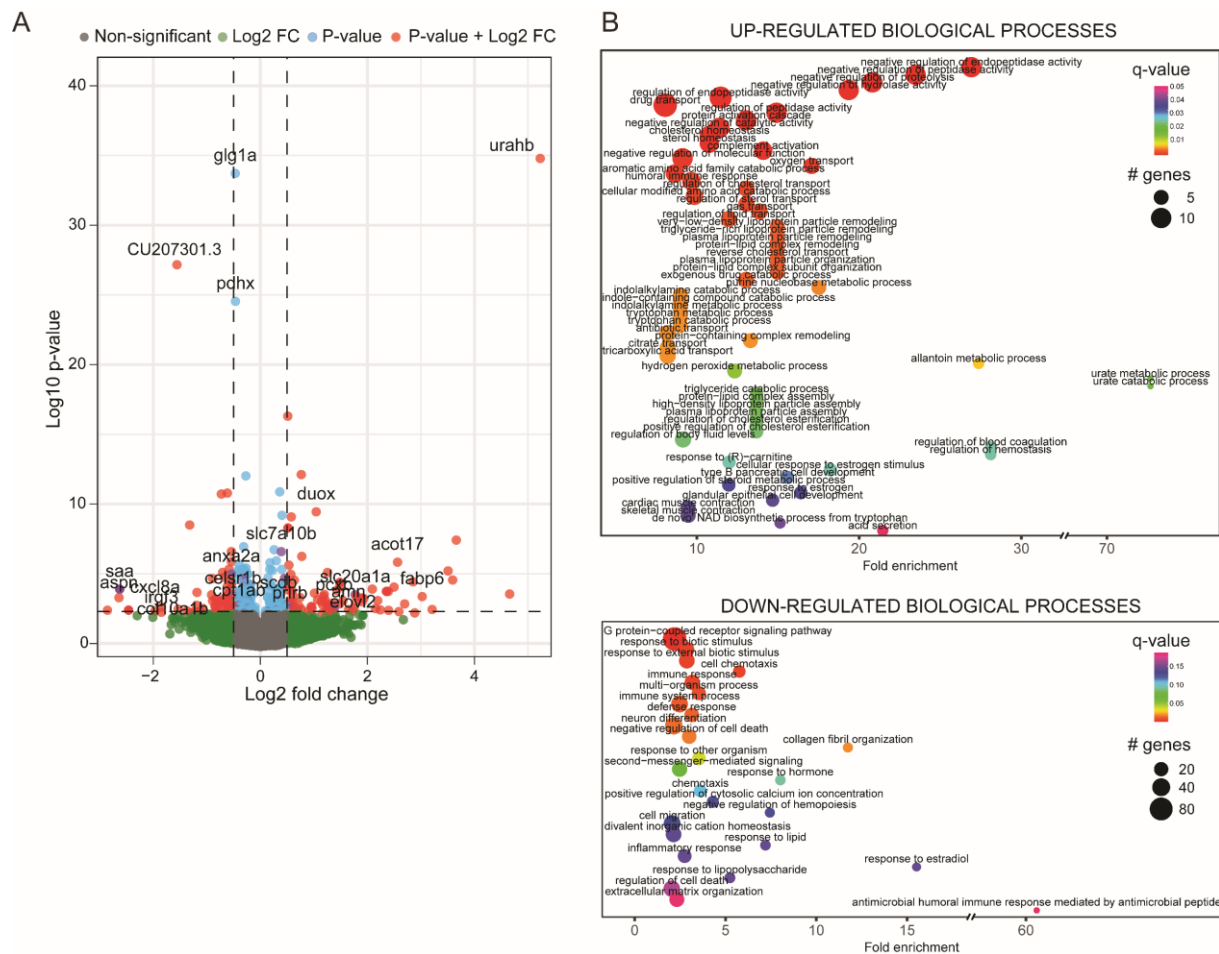

**Supplementary Figure 4. Slc7a10b loss-of-function mutation in overfed zebrafish upregulates genes involved in urate, purine, and lipid metabolic processes.**

Mature (four-month old) wildtype (WT) and Slc7a10b loss-of-function male zebrafish were fed 50-100% more than their regular feed for eight weeks. Visceral adipose tissue from three zebrafish housed in the same tank during the overfeeding was pooled. RNA was isolated and RNA-seq was performed. Sample reads were mapped against the Zebrafish genome (GRCz10) using HiSat (Version 2.05), matrixed in featureCounts (Version 1.5.2) and analyzed using DESeq2 (version 1.22.1).

**(A)** Volcano plot of differentially expressed genes between WT and Slc7a10b loss-of-function zebrafish. x-axis corresponds to log2 fold change (log2FC) and y-axis corresponds to  $-\log_{10}$  (P-value). The red dots represent the transcripts with an absolute log2FC > 0.5 and P-value < 10E-10; green dots represent the transcripts with an absolute log2FC > 0.5; blue dots represent transcripts with P-value < 10E-10; grey dots represent transcripts which do not pass above thresholds.

**(B)** Combined differentially expressed genes between Slc7a10b zebrafish WT and mutant into a single ranked list based on fold change, and gene ontology (GO) terms were analyzed using GOrilla (2). Enrichment plot representing up-regulated biological processes between WT and Slc7a10b loss-of-function zebrafish was visualized using the R package ggplot2. Biological processes with a P-value < 0.05 and fold enrichment  $\geq 8$  (arbitrary threshold for the sake of visual representation) are reported here.

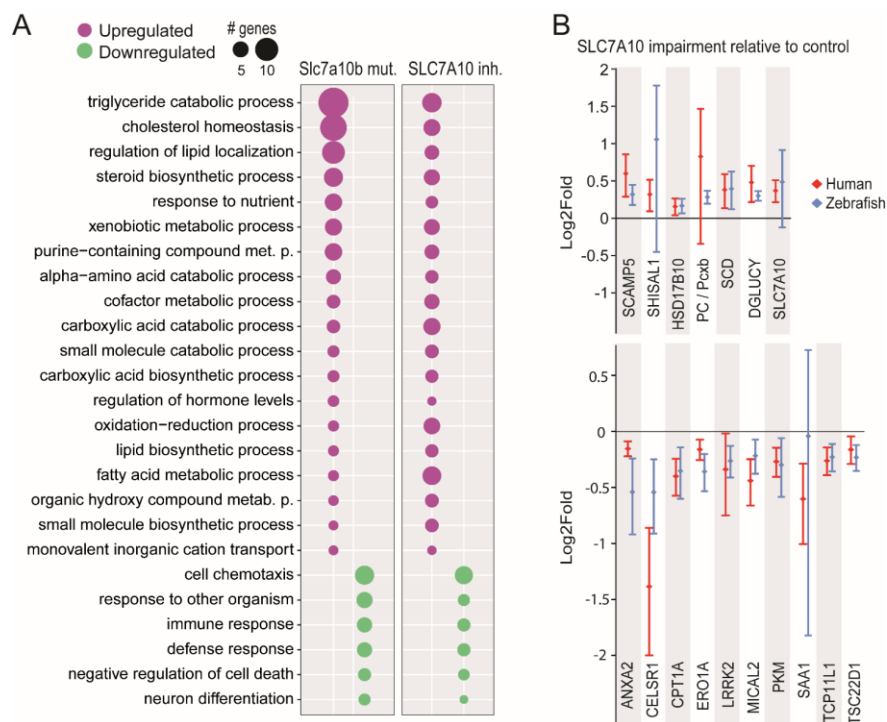

**Supplementary Figure 5. SLC7A10 impairment affects genes related to lipid- and energy metabolism in zebrafish adipose tissue and human primary adipocyte cultures.**

RNA-sequencing was performed as described in Supplementary Figures 2 and 4. For each dataset, genes were sorted based on fold change into a single ranked list, and analyzed using GOrilla to identify enriched ontologies (2). Significant ontologies were summarized for plotting utilizing the REVIGO web package, which clusters representative ontologies via semantic similarity (3). RPKM values for gene expression visualizations were generated using edgeR (Version 3.16.5). Overlapping ontologies between zebrafish adipose tissue and human adipose cultures were plotted using ggplot2 (Version 3.1.0).

**(A)** Gene ontologies enriched with differentially expressed genes identified in RNA-seq from both zebrafish mutant and SLC7A10 inhibitor treated human adipocytes compared to control. Differentially expressed genes were combined into a single ranked list based on fold change using GOrilla analysis (2). Enriched ontologies in both the zebrafish mutant and SLC7A10 inhibitor 1 RNA-seq were aggregated, filtered by enrichment and significance, and plotted by relative enrichment. Overlapping ontologies between Zebrafish and SLC7A10 inhibitor 1 RNA-seq were visualized using the R package ggplot2 (Version 3.1.0).

**(B)** Fold changes for up- and down-regulated genes in RNA-seq from both zebrafish mutant and SLC7A10 inhibitor 1 treated (10  $\mu$ M) human adipocytes compared to control. Outliers were removed using Whiskers Tukey outlier test. Data are presented as mean  $\pm$  SD.

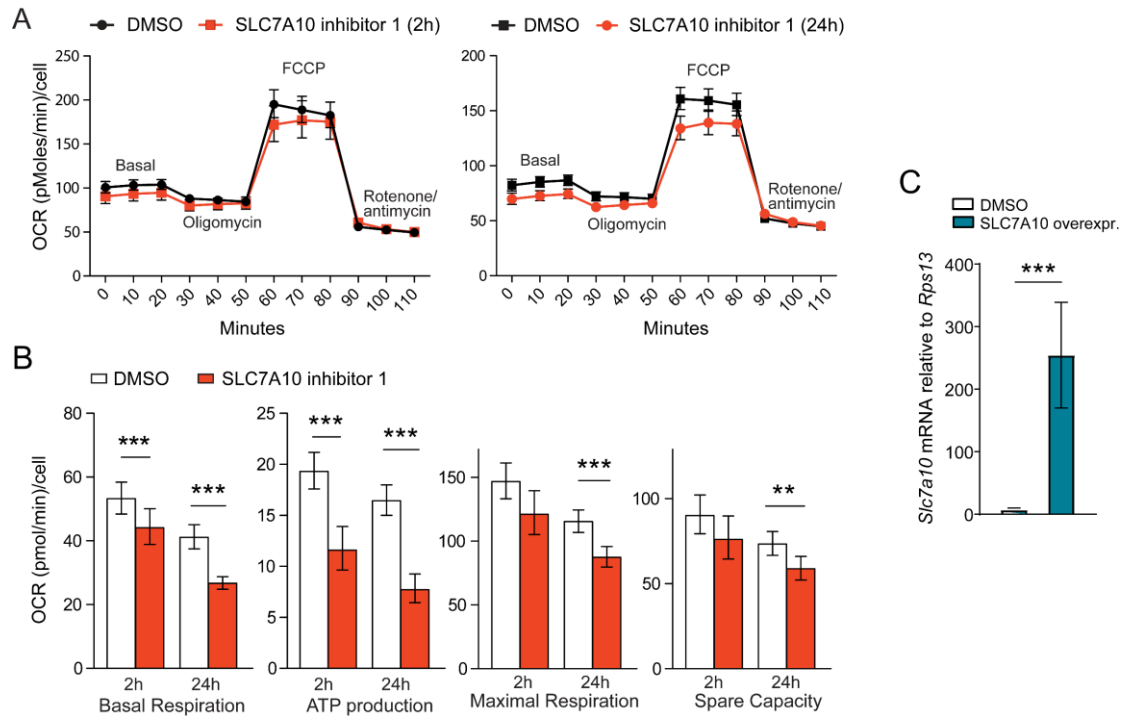

**Supplementary Figure 6. SLC7A10 inhibition affects mitochondrial respiration in cultured mouse adipocytes.**

3T3-L1s were differentiated and treated with SLC7A10 inhibitor 1 for either 2 or 24 hours, or *Slc7a10* was overexpressed every second day from day 2-8.

(A) OCR was measured at day 8 of differentiation under basal conditions and after sequential addition of the following compounds at indicated final concentrations; oligomycin (3  $\mu$ M); FCCP (1.5  $\mu$ M); rotenone (1  $\mu$ M) and antimycin A (1  $\mu$ M).

(B) Outliers were removed based on a Whisker Tukey test of the OCR data for each time point in each well, before calculation of basal respiration, ATP production, maximal respiration and spare respiratory capacity according to the manufacturer's protocol. Results are presented as geometric mean  $\pm$  95% confidence interval (n=22-24 replicate wells in a 96-well plate).

(C) 3T3-L1 preadipocytes were induced to differentiate and transfected with *Slc7a10* expression plasmid or empty vector on every second day of differentiation (days 2, 4 and 6) and mRNA was collected on day 8. *Slc7a10* expression was quantified by qPCR relative to *Rps13* expression (n=3)

\*\*, p<0.01. \*\*\*, p<0.001.

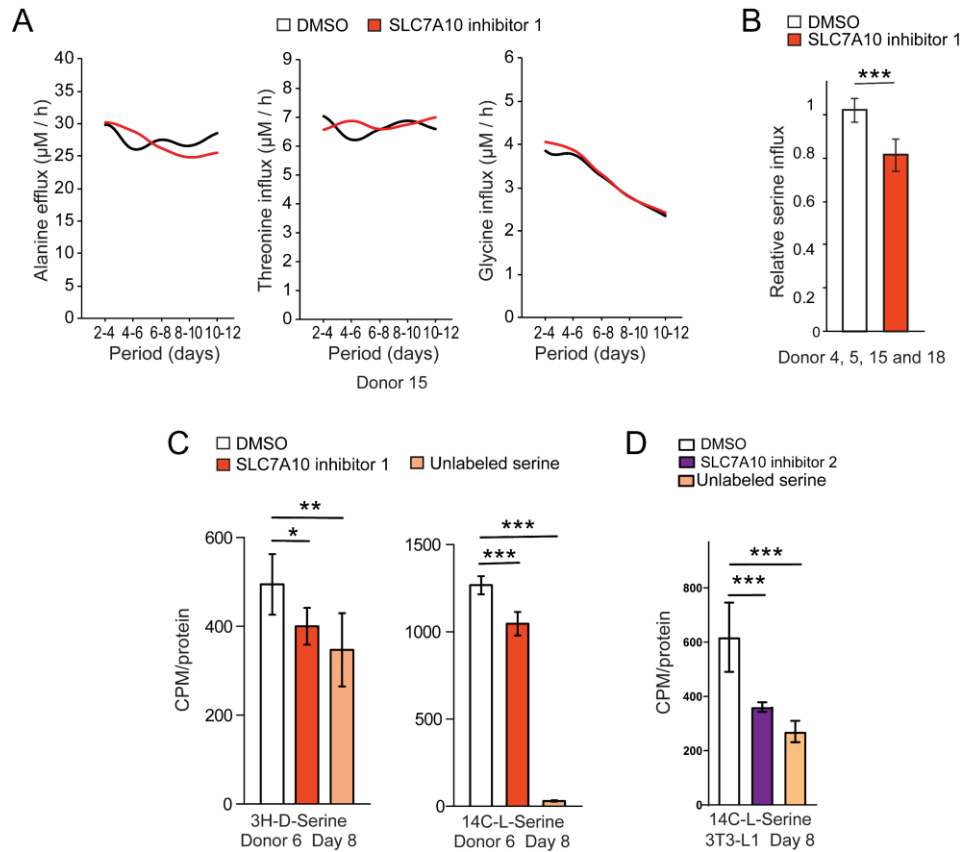

**Supplementary Figure 7. Inhibition of SLC7A10 in human primary and mouse adipocytes regulates adipocyte serine uptake and redox status.**

**(A)** Changes in alanine, threonine and glycine flux was not alter for hASCs treated with SLC7A10 inhibitor 1 throughout differentiation. Amino acid flux was calculated based on the amino acid concentrations in unconditioned medium and change in concentrations upon cell culture during 48-hour periods. Data for two replicate wells for a representative experiment are shown.

**(B)** The average reduction in serine influx due to SLC7A10 inhibition was calculated (as in A) for fully differentiated hASCs (day 10-12), for replicate experiments in cells from four different people.

**(C)** hASCs were treated with SLC7A10 inhibitor 1 for 30 minutes at day 8 of differentiation. Thereafter, radiolabeled 3H-D-serine (1 μM) or 14C-L-serine (1 μM) was added for 30 minutes and cellular uptake of the radiolabeled amino acids was measured in cell lysate. Unlabeled D-serine and L-serine (100 mM) were used as positive control of uptake inhibition. Data are presented as mean ± SD (n=3-6).

**(D)** 3T3-L1s were treated with SLC7A10 inhibitor 2 for 30 minutes at day 8 of differentiation. Thereafter, radiolabeled 14C-L-serine (1 μM) was added for 30 minutes and cellular uptake of the radiolabeled amino acids was measured in cell lysate. Unlabeled L-serine (100 mM) were used as positive control of uptake inhibition. Data are presented as mean ± SD (n=6).

\*, p<0.05, \*\*, p<0.01. \*\*\*, p<0.001.

### *Supplementary References*

1. Mi H, Muruganujan A, Huang X, Ebert D, Mills C, Guo X, et al. Protocol Update for large-scale genome and gene function analysis with the PANTHER classification system (v.14.0). *Nat Protoc* [Internet]. 2019 Mar 25 [cited 2019 Apr 4];14(3):703–21. Available from: <http://www.nature.com/articles/s41596-019-0128-8>
2. Eden E, Navon R, Steinfeld I, Lipson D, Yakhini Z. GOrilla: a tool for discovery and visualization of enriched GO terms in ranked gene lists. *BMC Bioinformatics* [Internet]. 2009 Feb 3 [cited 2018 Jan 31];10(1):48. Available from: <http://www.ncbi.nlm.nih.gov/pubmed/19192299>
3. Supek F, Bošnjak M, Škunca N, Šmuc T. REVIGO Summarizes and Visualizes Long Lists of Gene Ontology Terms. Gibas C, editor. *PLoS One* [Internet]. 2011 Jul 18 [cited 2019 Mar 27];6(7):e21800. Available from: <https://dx.plos.org/10.1371/journal.pone.0021800>
